# Supplementary material
Source: ML conference proceedings conference paper supplement (https://openreview.net/forum?id=2d34y5bRWxB)
Supplement: supplementary_material [file attachment]

## A DESCRIPTION OF BOHB

---

### Algorithm 1 BOHB

---

**Input:**  $b_{min}$ ,  $b_{max}$  and  $\eta$   $\triangleright$   $b$  stands for budget, while  $\eta$  stands for the downsampling rate  
**Initialization:**  $s_{max} = \log_{\eta} \frac{b_{max}}{b_{min}}$   
**for**  $s$  in  $(s_{max}, s_{max}-1, \dots, 0)$  **do**  
     $n = \frac{s_{max}+1}{s+1}$   $\triangleright$  Number of configurations  
    Call SH routine with  $\eta^{-s} \cdot b_{max}$  as an initial budget  $\triangleright$  SH = Successing Halving routine  
**end for**  
**Output:** Return hyperparameter configuration with the smallest loss

---

BOHB (Falkner et al., 2018a) is a hyperparameter optimization algorithm that extends Hyperband (Li et al., 2017) by sampling from a model instead of sampling randomly from the hyperparameter search space.

Initially, BOHB performs random search and favors exploration. As it iterates and gets more observations, it builds models over different fidelities and trades off exploration with exploitation to avoid converging in bad regions of the search space. BOHB samples from the model of the highest fidelity with a probability  $p$  and with  $1 - p$  from random. A model is built for a fidelity only when enough observations exist, by default the criteria is set to equal  $S + 1$ , where  $S$  is the dimensionality of the search space.

BOHB achieves strong anytime results by combining Random Search and Bayesian optimization and helps deep neural networks in achieving faster convergence compared with traditional Bayesian Optimisation methods.

## B CONFIGURATION SPACES

### B.1 METHOD IMPLICIT SEARCH SPACE

| Category         | Hyperparameter         | Type       | Range                    | Conditionality       |
|------------------|------------------------|------------|--------------------------|----------------------|
| Cosine Annealing | Iterations multiplier  | Continuous | {2.0}                    | Scheduler = COS      |
|                  | Max. iterations        | Integer    | {15}                     | Scheduler = COS      |
| Network          | Activation             | Nominal    | {ReLU}                   | —                    |
|                  | Bias initialization    | Nominal    | {Yes}                    | —                    |
|                  | Blocks in a group      | Integer    | {2}                      | —                    |
|                  | Embeddings             | Nominal    | {None}                   | —                    |
|                  | Number of groups       | Integer    | {2}                      | —                    |
|                  | Resnet shape           | Nominal    | {Brick}                  | Type = Shaped-Resnet |
|                  | Type                   | Nominal    | {Shaped-Resnet}          | —                    |
|                  | Units in a layer       | Integer    | {512}                    | —                    |
| Preprocessing    | Preprocessor           | Nominal    | {None}                   | —                    |
| Resampling       | Target size            | Nominal    | {Median, Upsample}       | —                    |
|                  | Under sampling         | Nominal    | {Random, None}           |                      |
| Training         | Batch size             | Integer    | {128}                    | —                    |
|                  | Imputation             | Nominal    | {Median}                 | —                    |
|                  | Initialization method  | Nominal    | {Default}                | —                    |
|                  | Learning rate          | Continuous | $\{10^{-3}\}$            | —                    |
|                  | Loss module            | Nominal    | {Weighted Cross-Entropy} | —                    |
|                  | Normalization strategy | Nominal    | {Standardize}            | —                    |
|                  | Optimizer              | Nominal    | {AdamW}                  | —                    |
|                  | Scheduler              | Nominal    | {COS}                    | —                    |
|                  | Seed                   | Integer    | {11}                     | —                    |

Table 2: The configuration space of the training and model architecture hyperparameters.

Table 2 presents the implicit search space used in all our experiments. The implicit search space is shared between all the individual regularizers and the regularization cocktail.

## B.2 AUTO-SKLEARN: GRADIENT BOOSTED DECISION TREE SEARCH SPACE

For Experiment 3, we set up the search space of Auto-Sklearn as follows:

| Hyperparameter         | Type       | Range               | Conditionality                |
|------------------------|------------|---------------------|-------------------------------|
| Early Stopping         | Nominal    | {Off, Train, Valid} | Estimator = Gradient Boosting |
| $L_2$ Regularization   | Continuous | $[1e - 10, 1]$      | Estimator = Gradient Boosting |
| Learning Rate          | Continuous | $[0.01, 1]$         | Estimator = Gradient Boosting |
| Max Leaf Nodes         | Integer    | $[3, 2047]$         | Estimator = Gradient Boosting |
| Min Samples Leaf       | Integer    | $[1, 200]$          | Estimator = Gradient Boosting |
| # Iterations No Change | Integer    | $[1, 20]$           | Estimator = Gradient Boosting |
| Validation Fraction    | Continuous | $[0.01, 0.4]$       | Estimator = Gradient Boosting |

Table 3: The search space of the training and model hyperparameters for the gradient boosting estimator of the Auto-Sklearn tool.

Furthermore, the estimator for Auto-Sklearn is restricted to only include GBDT, for the sake of fully comparing against the algorithm as a baseline. We do not activate any preprocessing since also our regularization cocktails do not make use of preprocessing algorithms in the pipeline. The time left is always selected based on the time it took BOHB to find the hyperparameter with the best validation accuracy from the start of the hyperparameter optimization phase. The ensemble size is kept to 1 since, our method only features one classifier and not multiple ones. The seed is set to 11 as it was set in the experiments with the regularization cocktail, so we can have the same data splits. To keep the comparison fair, there is no warm start for the initial configurations with meta learning, since, our method also does not make use of meta learning. Lastly, the number of workers in parallel is set to 10 to match the parallel resources that were given to the experiment with the regularization cocktails.

## C PLOTS

### C.1 EXPERIMENT 1: REGULARIZATION COCKTAIL PERFORMANCE

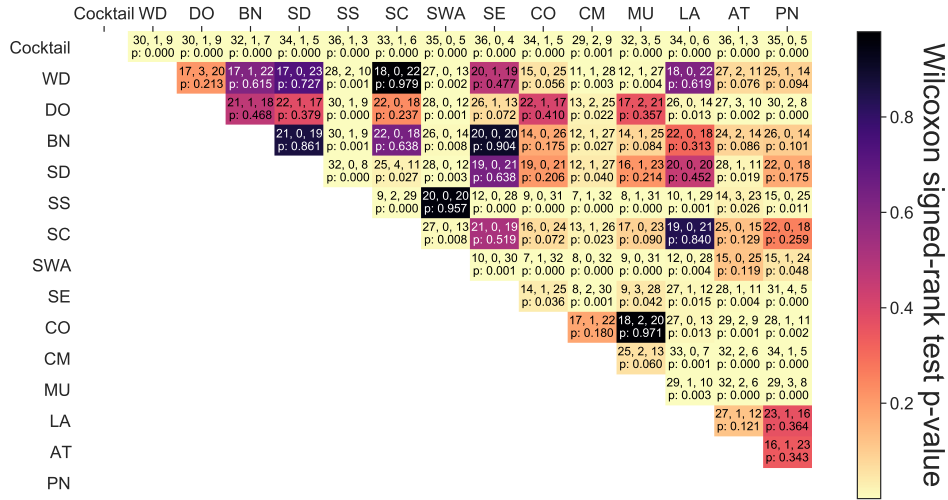

Figure 6: **Pairwise statistical significance and comparison.** For every entry, the first row shows the wins, draws and losses of the horizontal method with the vertical method on all datasets, calculated on the test set; the second row presents the p-value for the statistical significance test.

In Figure 6, we present the results of each pairwise comparison. The results presented are calculated on the test set after the refit phase is completed on the best hyperparameter configuration. The p-value is generated by performing the Wilcoxon signed rank test. As can be seen from the results, the regularization cocktail is the only method that has statistically significant results compared to all the other methods.

## C.2 EXPERIMENT 2: DATASET-DEPENDENT OPTIMAL COCKTAILS

In Figure 7, we present the occurrences of every regularization method over all datasets. The occurrences are calculated by analyzing the best found hyperparameter configuration for each dataset and observing the number of times the regularization method was chosen to be activated by BOHB.

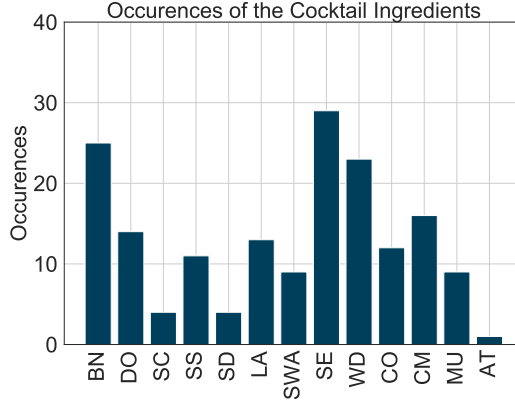

Figure 7: **Frequency of the regularization techniques.** The occurrences of the individual regularization techniques in the best hyperparameter configurations found by the cocktail across 42 datasets.

## D TABLES

In this section, at Table 4 we provide information about the datasets that are considered in our experiments. Concretely, we provide descriptive statistics and the identifiers for every dataset. The identifier (the task id) can be used to download the datasets from OpenML.

| Task Id | Dataset Name      | Number of Instances | Number of Features | Majority Class Percentage | Minority Class Percentage |
|---------|-------------------|---------------------|--------------------|---------------------------|---------------------------|
| 233090  | anneal            | 898                 | 39                 | 76.17                     | 0.89                      |
| 233091  | kr-vs-kp          | 3196                | 37                 | 52.22                     | 47.78                     |
| 233092  | arrhythmia        | 452                 | 280                | 54.20                     | 0.44                      |
| 233093  | mfeat-factors     | 2000                | 217                | 10.00                     | 10.00                     |
| 233088  | credit-g          | 1000                | 21                 | 70.00                     | 30.00                     |
| 233094  | vehicle           | 846                 | 19                 | 25.77                     | 23.52                     |
| 233096  | kc1               | 2109                | 22                 | 84.54                     | 15.46                     |
| 233099  | adult             | 48842               | 15                 | 76.07                     | 23.93                     |
| 233102  | walking-activity  | 149332              | 5                  | 14.73                     | 0.61                      |
| 233103  | phoneme           | 5404                | 6                  | 70.65                     | 29.35                     |
| 233104  | skin-segmentation | 245057              | 4                  | 79.25                     | 20.75                     |
| 233106  | ldpa              | 164860              | 8                  | 33.05                     | 0.84                      |
| 233107  | nomao             | 34465               | 119                | 71.44                     | 28.56                     |
| 233108  | cnae-9            | 1080                | 857                | 11.11                     | 11.11                     |
| 233109  | blood-transfusion | 748                 | 5                  | 76.20                     | 23.80                     |
| 233110  | bank-marketing    | 45211               | 17                 | 88.30                     | 11.70                     |
| 233112  | connect-4         | 67557               | 43                 | 65.83                     | 9.55                      |
| 233113  | shuttle           | 58000               | 10                 | 78.60                     | 0.02                      |
| 233114  | higgs             | 98050               | 29                 | 52.86                     | 47.14                     |
| 233115  | Australian        | 690                 | 15                 | 55.51                     | 44.49                     |
| 233116  | car               | 1728                | 7                  | 70.02                     | 3.76                      |
| 233117  | segment           | 2310                | 20                 | 14.29                     | 14.29                     |
| 233118  | Fashion-MNIST     | 70000               | 785                | 10.00                     | 10.00                     |
| 233119  | Jungle-Chess-2pcs | 44819               | 7                  | 51.46                     | 9.67                      |
| 233120  | numera128.6       | 96320               | 22                 | 50.52                     | 49.48                     |
| 233121  | Devnagari-Script  | 92000               | 1025               | 2.17                      | 2.17                      |
| 233122  | helena            | 65196               | 28                 | 6.14                      | 0.17                      |
| 233123  | jannis            | 83733               | 55                 | 46.01                     | 2.01                      |
| 233124  | volkert           | 58310               | 181                | 21.96                     | 2.33                      |
| 233126  | MiniBooNE         | 130064              | 51                 | 71.94                     | 28.06                     |
| 233130  | APSFailure        | 76000               | 171                | 98.19                     | 1.81                      |
| 233131  | christine         | 5418                | 1637               | 50.00                     | 50.00                     |
| 233132  | dilbert           | 10000               | 2001               | 20.49                     | 19.13                     |
| 233133  | fabert            | 8237                | 801                | 23.39                     | 6.09                      |
| 233134  | jasmine           | 2984                | 145                | 50.00                     | 50.00                     |
| 233135  | sylvine           | 5124                | 21                 | 50.00                     | 50.00                     |
| 233137  | dionis            | 416188              | 61                 | 0.59                      | 0.21                      |
| 233142  | aloi              | 108000              | 129                | 0.10                      | 0.10                      |
| 233143  | C.C.FraudD.       | 284807              | 31                 | 99.83                     | 0.17                      |
| 233146  | Click prediction  | 399482              | 12                 | 83.21                     | 16.79                     |

Table 4: **Datasets.** The collection of datasets used in our experiments, combined with detailed information for each dataset.

Moreover, Table 5 shows the results for the comparison between the Regularization Cocktail and the Top-5 cocktail variants as described in Experiment 2. The results are calculated on the test set for all datasets, after retraining on the best dataset-specific hyperparameter configuration.

| Task Id | Cockt. | Top-5 F | Top-5 R | Task Id | Cockt. | Top-5 F | Top-5 R | Task Id | Cockt. | Top-5 F | Top-5 R |
|---------|--------|---------|---------|---------|--------|---------|---------|---------|--------|---------|---------|
| 233090  | 89.27  | 89.71   | 88.54   | 233091  | 99.85  | 99.85   | 98.20   | 233092  | 61.46  | 59.94   | 57.21   |
| 233093  | 98.00  | 98.75   | 98.75   | 233088  | 74.64  | 71.43   | 74.76   | 233094  | 82.58  | 82.01   | 80.33   |
| 233096  | 74.38  | 78.03   | 73.96   | 233099  | 82.44  | 82.35   | 82.24   | 233102  | 63.92  | 62.21   | 54.10   |
| 233103  | 86.62  | 85.90   | 82.33   | 233104  | 99.95  | 99.96   | 99.85   | 233106  | 68.11  | 68.81   | 55.45   |
| 233107  | 96.83  | 96.67   | 96.59   | 233108  | 95.83  | 95.83   | 95.83   | 233109  | 67.62  | 67.32   | 68.20   |
| 233110  | 85.99  | 86.35   | 86.06   | 233112  | 80.07  | 79.57   | 77.49   | 233113  | 99.95  | 97.95   | 85.34   |
| 233114  | 73.55  | 73.25   | 72.06   | 233115  | 87.09  | 88.11   | 87.60   | 233116  | 99.59  | 100.00  | 98.20   |
| 233117  | 93.72  | 93.94   | 90.69   | 233118  | 91.95  | 91.83   | 91.59   | 233119  | 97.47  | 92.66   | 85.53   |
| 233120  | 52.67  | 52.49   | 51.70   | 233121  | 98.37  | 98.41   | 96.93   | 233122  | 27.70  | 28.82   | 28.09   |
| 233123  | 65.29  | 65.13   | 62.11   | 233124  | 71.67  | 70.87   | 66.06   | 233126  | 94.02  | 88.13   | 93.16   |
| 233130  | 92.53  | 96.24   | 95.89   | 233131  | 74.26  | 71.86   | 74.63   | 233132  | 99.05  | 98.95   | 98.55   |
| 233133  | 69.18  | 68.75   | 69.03   | 233134  | 79.22  | 78.21   | 77.71   | 233135  | 94.05  | 94.43   | 93.95   |
| 233137  | 94.01  | 94.33   | 92.43   | 233142  | 97.17  | 97.06   | 96.06   |         |        |         |         |
| 233146  | 64.28  | 64.53   | 63.28   | 233143  | 92.53  | 92.13   | 92.59   |         |        |         |         |

Table 5: **Top-5 baselines.** The test set performance for the Regularization Cocktail against the Top-5 Most Frequent (Top-5 F) and the Top-5 Highest Ranks (Top-5 R) baselines.

At Table 6 we provide the results of all our experiments for the baseline, the individual regularization methods and the regularization cocktail. All the results are calculated on the test set after retraining on the best found hyperparameter configurations. The evaluation metric used for the performance is the balanced accuracy.

| Task Id | PN    | BN     | LA    | SE    | SWA   | SC     | AT    | SS    | SD    | MU    | CO    | CM    | WD    | DO    | Cocktail |
|---------|-------|--------|-------|-------|-------|--------|-------|-------|-------|-------|-------|-------|-------|-------|----------|
| 233090  | 84.13 | 86.78  | 83.99 | 86.48 | 87.96 | 87.21  | 86.92 | 84.28 | 87.21 | 89.27 | 85.60 | 86.77 | 87.06 | 86.92 | 89.27    |
| 233091  | 99.70 | 99.85  | 99.70 | 99.70 | 99.55 | 100.00 | 99.85 | 99.85 | 99.69 | 99.85 | 99.55 | 99.85 | 99.85 | 99.85 | 99.85    |
| 233092  | 37.99 | 41.91  | 36.14 | 37.31 | 25.94 | 53.42  | 38.79 | 55.61 | 53.26 | 42.19 | 32.48 | 42.22 | 35.76 | 38.70 | 61.46    |
| 233093  | 97.75 | 98.50  | 96.00 | 97.75 | 69.25 | 98.25  | 97.25 | 97.25 | 98.25 | 98.00 | 98.00 | 97.75 | 98.00 | 98.00 | 98.00    |
| 233088  | 69.40 | 68.69  | 70.83 | 69.76 | 69.40 | 66.43  | 69.29 | 66.43 | 67.14 | 70.00 | 70.36 | 64.29 | 69.29 | 68.10 | 74.64    |
| 233094  | 83.77 | 83.17  | 84.36 | 84.39 | 83.36 | 80.82  | 83.17 | 83.20 | 81.98 | 83.77 | 81.47 | 78.65 | 83.20 | 82.60 | 82.58    |
| 233096  | 70.27 | 66.56  | 71.95 | 76.43 | 75.44 | 77.40  | 71.95 | 65.31 | 78.31 | 72.43 | 76.84 | 74.94 | 67.33 | 72.98 | 74.38    |
| 233099  | 76.89 | 77.92  | 75.95 | 78.23 | 76.38 | 78.38  | 76.75 | 75.56 | 78.61 | 78.67 | 82.56 | 82.23 | 76.99 | 78.52 | 82.44    |
| 233102  | 61.00 | 62.89  | 61.32 | 63.57 | 56.67 | 60.79  | 59.99 | 43.04 | 60.77 | 61.95 | 63.30 | 63.49 | 64.03 | 63.75 | 63.92    |
| 233103  | 87.51 | 87.02  | 88.25 | 87.03 | 87.22 | 85.90  | 87.99 | 87.64 | 85.90 | 87.12 | 87.26 | 86.59 | 86.74 | 88.39 | 86.62    |
| 233104  | 99.97 | 99.96  | 99.96 | 99.94 | 2.57  | 99.97  | 99.95 | 92.77 | 99.97 | 99.95 | 99.96 | 99.97 | 99.96 | 99.96 | 99.95    |
| 233106  | 62.83 | 68.90  | 62.46 | 65.70 | 62.16 | 61.85  | 61.89 | 44.63 | 62.05 | 66.29 | 65.43 | 64.99 | 66.50 | 67.04 | 68.11    |
| 233107  | 95.92 | 95.93  | 96.01 | 96.36 | 95.23 | 95.76  | 95.77 | 95.37 | 96.22 | 96.52 | 96.10 | 96.55 | 95.98 | 96.23 | 96.83    |
| 233108  | 87.50 | 91.20  | 85.65 | 87.96 | 50.00 | 93.98  | 92.59 | 94.91 | 94.44 | 94.44 | 93.06 | 95.37 | 91.67 | 90.74 | 95.83    |
| 233109  | 67.84 | 73.68  | 66.52 | 68.20 | 66.45 | 65.20  | 66.89 | 66.74 | 67.03 | 68.64 | 67.32 | 70.18 | 66.23 | 68.42 | 67.62    |
| 233110  | 78.08 | 72.58  | 72.70 | 83.40 | 66.93 | 72.74  | 74.12 | 70.16 | 74.76 | 74.09 | 85.71 | 85.76 | 72.34 | 83.14 | 85.99    |
| 233112  | 73.63 | 74.68  | 73.37 | 74.33 | 77.36 | 73.86  | 72.91 | 72.06 | 74.35 | 72.08 | 76.23 | 75.74 | 72.48 | 76.35 | 80.07    |
| 233113  | 99.47 | 99.89  | 99.92 | 99.87 | 55.86 | 98.11  | 99.46 | 90.60 | 98.11 | 99.94 | 99.92 | 99.91 | 99.88 | 99.89 | 99.95    |
| 233114  | 67.75 | 68.90  | 68.81 | 69.11 | 67.36 | 68.08  | 67.44 | 67.70 | 68.56 | 68.59 | 71.93 | 73.13 | 67.80 | 66.87 | 73.55    |
| 233115  | 86.27 | 85.79  | 88.73 | 86.44 | 87.26 | 87.74  | 88.39 | 87.74 | 88.39 | 88.73 | 88.25 | 88.90 | 87.91 | 86.27 | 87.09    |
| 233116  | 97.44 | 100.00 | 96.79 | 97.44 | 87.35 | 99.47  | 99.14 | 97.46 | 99.69 | 99.37 | 97.64 | 99.04 | 97.44 | 99.69 | 99.59    |
| 233117  | 94.81 | 92.86  | 93.51 | 93.51 | 90.48 | 93.72  | 92.86 | 92.64 | 93.72 | 93.51 | 93.07 | 93.72 | 93.94 | 94.59 | 93.72    |
| 233118  | 90.46 | 90.86  | 90.73 | 90.75 | 81.72 | 89.91  | 90.69 | 86.69 | 90.06 | 91.11 | 91.09 | 91.88 | 90.70 | 90.51 | 91.95    |
| 233119  | 97.06 | 93.76  | 97.79 | 96.08 | 92.15 | 87.83  | 97.16 | 87.08 | 87.68 | 98.14 | 96.50 | 97.51 | 97.33 | 97.24 | 97.47    |
| 233120  | 50.26 | 50.95  | 51.29 | 50.50 | 51.63 | 50.92  | 50.17 | 50.23 | 51.00 | 50.72 | 52.35 | 52.10 | 50.41 | 50.30 | 52.67    |
| 233121  | 96.12 | 97.83  | 96.45 | 96.74 | 92.40 | 95.31  | 96.34 | 91.38 | 95.15 | 97.52 | 97.88 | 97.80 | 96.88 | 97.00 | 98.37    |
| 233122  | 16.84 | 22.26  | 17.20 | 19.65 | 20.90 | 24.53  | 16.77 | 18.71 | 24.35 | 23.62 | 23.43 | 24.10 | 17.52 | 23.98 | 27.70    |
| 233123  | 51.51 | 51.74  | 50.86 | 53.16 | 56.11 | 53.58  | 49.65 | 49.88 | 51.94 | 51.22 | 60.98 | 61.67 | 51.13 | 55.12 | 65.29    |
| 233124  | 65.08 | 66.82  | 65.57 | 66.56 | 66.15 | 57.71  | 65.26 | 64.97 | 58.04 | 67.24 | 70.03 | 68.84 | 66.86 | 67.00 | 71.67    |
| 233126  | 90.64 | 58.17  | 90.42 | 92.94 | 92.60 | 93.99  | 90.45 | 88.55 | 93.98 | 93.58 | 93.86 | 93.87 | 92.97 | 94.10 | 94.02    |
| 233130  | 87.76 | 87.81  | 88.98 | 88.99 | 70.72 | 87.99  | 50.00 | 85.25 | 88.35 | 92.43 | 50.00 | 95.81 | 94.92 | 91.19 | 92.53    |
| 233131  | 70.94 | 69.28  | 71.59 | 70.94 | 71.31 | 72.14  | 71.59 | 71.59 | 72.32 | 70.94 | 72.69 | 72.42 | 70.76 | 70.76 | 74.26    |
| 233132  | 96.93 | 98.62  | 97.52 | 97.14 | 94.58 | 96.85  | 97.00 | 97.27 | 96.90 | 98.66 | 98.14 | 99.15 | 96.81 | 96.73 | 99.05    |
| 233133  | 63.71 | 65.11  | 65.00 | 66.05 | 64.57 | 66.21  | 62.82 | 64.33 | 65.98 | 68.75 | 66.58 | 66.28 | 64.36 | 64.81 | 69.18    |
| 233134  | 78.05 | 75.87  | 79.05 | 78.22 | 80.38 | 78.38  | 76.88 | 78.38 | 78.38 | 76.88 | 77.38 | 76.54 | 76.88 | 76.21 | 79.22    |
| 233135  | 93.07 | 92.49  | 92.10 | 93.17 | 93.17 | 92.10  | 93.17 | 93.27 | 92.10 | 92.58 | 92.68 | 94.53 | 93.75 | 93.36 | 94.05    |
| 233137  | 91.91 | 93.71  | 92.16 | 92.56 | 90.38 | 91.58  | 91.36 | 88.09 | 91.60 | 92.72 | 92.48 | 92.39 | 92.95 | 92.72 | 94.01    |
| 233142  | 92.33 | 96.70  | 92.90 | 92.35 | 63.59 | 95.47  | 91.43 | 93.60 | 95.56 | 93.47 | 93.81 | 93.25 | 92.60 | 93.85 | 97.17    |
| 233143  | 50.00 | 92.30  | 92.76 | 50.00 | 70.81 | 90.28  | 50.00 | 50.31 | 89.26 | 50.00 | 50.00 | 50.00 | 92.26 | 50.00 | 92.53    |
| 233146  | 63.12 | 60.06  | 62.79 | 64.16 | 63.39 | 64.42  | 63.52 | 54.64 | 64.21 | 64.26 | 64.05 | 64.57 | 64.41 | 64.37 | 64.28    |

Table 6: **Detailed Table of Results.** The test set performance for the plain network, individual regularization methods and for the regularization cocktails.

Lastly, at Table 7 we present the results of Experiment 3 where we compare our method with GBDT. The results describe the balanced accuracy calculated on the test set after retraining on both methods on the best hyperparameter configuration found within the given budget.

| Task Id | GBDT    | Cockt. | Task Id | GBDT   | Cockt. | Task Id | GBDT   | Cockt. | Task Id | GBDT   | Cockt. |
|---------|---------|--------|---------|--------|--------|---------|--------|--------|---------|--------|--------|
| 233090  | 90.000  | 89.270 | 233091  | 99.850 | 99.850 | 233092  | 46.850 | 61.461 | 233093  | 97.500 | 98.000 |
| 233088  | 71.191  | 74.643 | 233094  | 80.165 | 82.576 | 233096  | 63.353 | 74.381 | 233099  | 79.830 | 82.443 |
| 233102  | 62.764  | 63.923 | 233103  | 88.341 | 86.619 | 233104  | 99.967 | 99.953 | 233106  | 68.947 | 68.107 |
| 233107  | 97.217  | 96.826 | 233108  | 93.519 | 95.833 | 233109  | 64.985 | 67.617 | 233110  | 72.283 | 85.993 |
| 233112  | 72.645  | 80.073 | 233113  | 98.571 | 99.948 | 233114  | 72.926 | 73.546 | 233115  | 88.589 | 87.088 |
| 233116  | 100.000 | 99.587 | 233117  | 93.074 | 93.723 | 233118  | 90.457 | 91.950 | 233119  | 83.070 | 97.471 |
| 233120  | 52.421  | 52.668 | 233121  | 77.897 | 98.370 | 233122  | 21.144 | 27.70  | 233123  | 55.593 | 65.287 |
| 233124  | 63.428  | 71.667 | 233126  | 94.137 | 94.015 | 233130  | 91.797 | 92.535 | 233131  | 74.447 | 74.262 |
| 233132  | 98.704  | 99.049 | 233133  | 70.120 | 69.183 | 233134  | 78.878 | 79.217 | 233135  | 95.119 | 94.045 |
| 233137  | 74.620  | 94.01  | 233142  | 13.534 | 97.17  | 233143  | 92.514 | 92.531 | 233146  | 58.201 | 64.280 |

Table 7: **Results of Experiment 3** The performances of the Regularization Cocktail and the GBDT algorithm over the different datasets.
